# Supplementary material for: Lead-free halide Cs2MnCl4:Cu+ as a new phosphor for efficient green light emission
Source: Royal Society of Chemistry journal article supplement (doi:10.1039/d2tc04607e), 2023-01-01
Supplement: d2tc04607e1.pdf [file d2tc04607e1.pdf]

## Supporting Information

### **Lead-free halide Cs<sub>2</sub>MnCl<sub>4</sub>:Cu<sup>+</sup> as a new phosphor for efficient green light emission**

Jingshan Hou,<sup>a,\*</sup> Jianghua Wu,<sup>a,b</sup> Zhiyu Qin,<sup>a</sup> Yongzheng Fang,<sup>a,\*</sup> Leijun Shen,<sup>c</sup> Xin Qiao,<sup>c</sup> Langping Dong,<sup>a</sup> Ganghua Zhang,<sup>a</sup> Yufeng Liu,<sup>a</sup> Guoying Zhao,<sup>a</sup> and Haijie Chen<sup>b,\*</sup>

<sup>a</sup>. School of Materials Science and Engineering, Shanghai Institute of Technology, Shanghai, 201418, China. \* E-mail: houjingshan@sit.edu.cn (J.S. Hou); fyz1003@sina.com (Y.F. Fang)

<sup>b</sup>. State Key Laboratory for Modification of Chemical Fibers and Polymer Materials, Institute of Functional Materials, College of Materials Science and Engineering, Donghua University, Shanghai, 201620, China. \* E-mail: haijie.chen@dhu.edu.cn (H.J. Chen)

<sup>c</sup>. Baotou Research Institute of Rare Earths, Baotou, 014030, China

**Table S1 Inductively coupled plasma optical emission spectrometer (ICP-OES) results of  $\text{Cs}_2\text{Mn}_x\text{Cu}_{1-x}\text{Cl}_4$ .**

| Sample Labels                                          | Mn<br>(mg/L) | Cu<br>(mg/L) | The ratio of Mn to Cu<br>(mol) |
|--------------------------------------------------------|--------------|--------------|--------------------------------|
| $\text{Cs}_2\text{MnCl}_4$                             | 219.343      | 0            | /                              |
| $\text{Cs}_2\text{Mn}_{0.9}\text{Cu}_{0.1}\text{Cl}_4$ | 278.117      | 32.907       | 1:0.102                        |

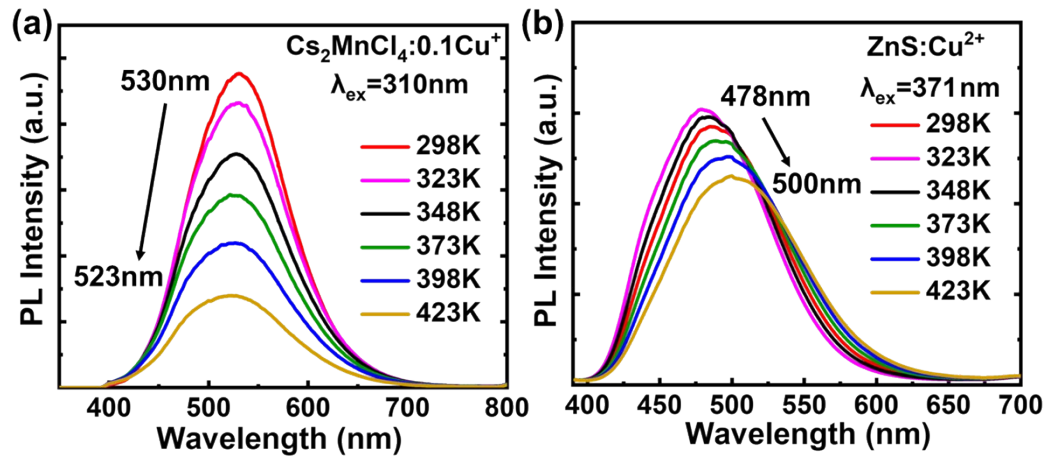

**Fig. S1** : (a) Temperature-dependent PL spectra of  $\text{Cs}_2\text{MnCl}_4:\text{Cu}^+$ . (b) Temperature-dependent PL spectra of  $\text{ZnS:Cu}^{2+}$ .

The thermal stability performance of  $\text{Cs}_2\text{MnCl}_4:0.1\text{Cu}^+$  together and the commercially used  $\text{ZnS:Cu}^{2+}$  were taken out (see Fig.R5). The PL intensity of  $\text{Cs}_2\text{MnCl}_4:0.1\text{Cu}^+$  and  $\text{ZnS:Cu}^{2+}$  decreases with increasing temperature, and the intensity reduces to 30% and 75% of the original intensity, respectively. Generally, the commercial used  $\text{ZnS:Cu}^{2+}$  phosphor shows better thermal stability than that of  $\text{Cs}_2\text{MnCl}_4:0.1\text{Cu}^+$ . However, with increasing temperature, the  $\text{ZnS:Cu}^{2+}$  shows obvious red-shift emission (from 478 nm-500 nm), while the  $\text{Cs}_2\text{MnCl}_4:0.1\text{Cu}^+$  shows slight blue-shift emission (from 530 nm-523 nm). This result suggests that  $\text{Cs}_2\text{MnCl}_4:0.1\text{Cu}^+$  will be more helpful in helping the light source achieve stable light output rather than chromaticity drift when used in LEDs
